# Supplementary material
Source: PubMed Central journal article supplement (PMC3163441)

Supplementary information: Analysis of Current Smokers

**Table S1. Prevalence, Factor Analysis, and Item Response Theory Analysis of Nicotine Dependence and Abuse Criteria in Current Smokers, N=521**

| <u>Lifetime Criteria</u>                        |            | Factor Loadings |          |                      |        | Item Response Theory parameters |                 |                       |                 |
|-------------------------------------------------|------------|-----------------|----------|----------------------|--------|---------------------------------|-----------------|-----------------------|-----------------|
|                                                 |            | Dependence      |          | Dependence and Abuse |        | Dependence                      |                 | Dependence and Abuse  |                 |
|                                                 |            | 1-factor        | 1-factor | 2-factors            |        | Discrimination (s.e.)           | Severity (s.e.) | Discrimination (s.e.) | Severity (s.e.) |
| <u>Nicotine Dependence</u>                      | % (N)      |                 |          |                      |        |                                 |                 |                       |                 |
| Tolerance                                       | 62.6 (326) | 0.712           | 0.711    | 0.253                | 0.527  | 1.731 (0.26)                    | -0.450 (0.09)   | 1.693 (0.24)          | -0.454 (0.09)   |
| Withdrawal                                      | 23.8 (124) | 0.517           | 0.547    | 0.507                | 0.124  | 1.013 (0.18)                    | 1.379 (0.21)    | 1.105 (0.18)          | 1.302 (0.18)    |
| Larger/longer                                   | 38.2 (199) | 0.790           | 0.768    | 0.353                | 0.496  | 2.208 (0.37)                    | 0.385 (0.08)    | 2.025 (0.29)          | 0.402 (0.08)    |
| Quit/control                                    | 30.1 (157) | 0.506           | 0.499    | 0.716                | -0.102 | 0.979 (0.17)                    | 1.028 (0.17)    | 0.955 (0.16)          | 1.047 (0.17)    |
| Time spent                                      | 24.4 (127) | 0.655           | 0.675    | 0.003                | 0.726  | 1.520 (0.24)                    | 1.046 (0.13)    | 1.603 (0.25)          | 1.021 (0.12)    |
| Activities given up                             | 10.0 (52)  | 0.464           | 0.453    | 0.168                | 0.329  | 0.940 (0.20)                    | 2.686 (0.42)    | 0.947 (0.20)          | 2.669 (0.46)    |
| Physical/psychological                          | 68.9 (359) | 0.689           | 0.672    | 0.421                | 0.335  | 1.584 (0.24)                    | -0.724 (0.10)   | 1.528 (0.22)          | -0.739 (0.11)   |
| <u>Nicotine Abuse</u>                           |            |                 |          |                      |        |                                 |                 |                       |                 |
| Neglect roles                                   | 06.5 (34)  |                 | 0.606    | 0.692                | 0.017  |                                 |                 | 1.525 (0.34)          | 2.312 (0.34)    |
| Hazardous use                                   | 24.0 (125) |                 | 0.555    | -0.205               | 0.795  |                                 |                 | 1.144 (0.19)          | 1.260 (0.17)    |
| Social/interpersonal                            | 32.4 (169) |                 | 0.497    | 0.050                | 0.486  |                                 |                 | 0.947 (0.15)          | 0.921 (0.16)    |
| <u>Model Fit Indices</u>                        |            |                 |          |                      |        |                                 |                 |                       |                 |
| Comparative Fit Index (CFI)                     |            | 0.981           | 0.974    | 0.992                |        |                                 |                 |                       |                 |
| Tucker-Lewis Index (TLI)                        |            | 0.976           | 0.973    | 0.989                |        |                                 |                 |                       |                 |
| Root mean square error of approximation (RMSEA) |            | 0.039           | 0.036    | 0.023                |        |                                 |                 |                       |                 |
| Akaike Information Criterion (AIC)              |            |                 |          |                      |        |                                 | 3829.351        |                       | 5175.137        |
| Bayesian Information Criterion (BIC)            |            |                 |          |                      |        |                                 | 3888.931        |                       | 5260.252        |
| Sample-size corrected BIC (SS-BIC)              |            |                 |          |                      |        |                                 | 3844.492        |                       | 5196.767        |

Figure S1: Item Characteristic Curves for Nicotine Dependence and Abuse Criteria in Current Smokers, N=521

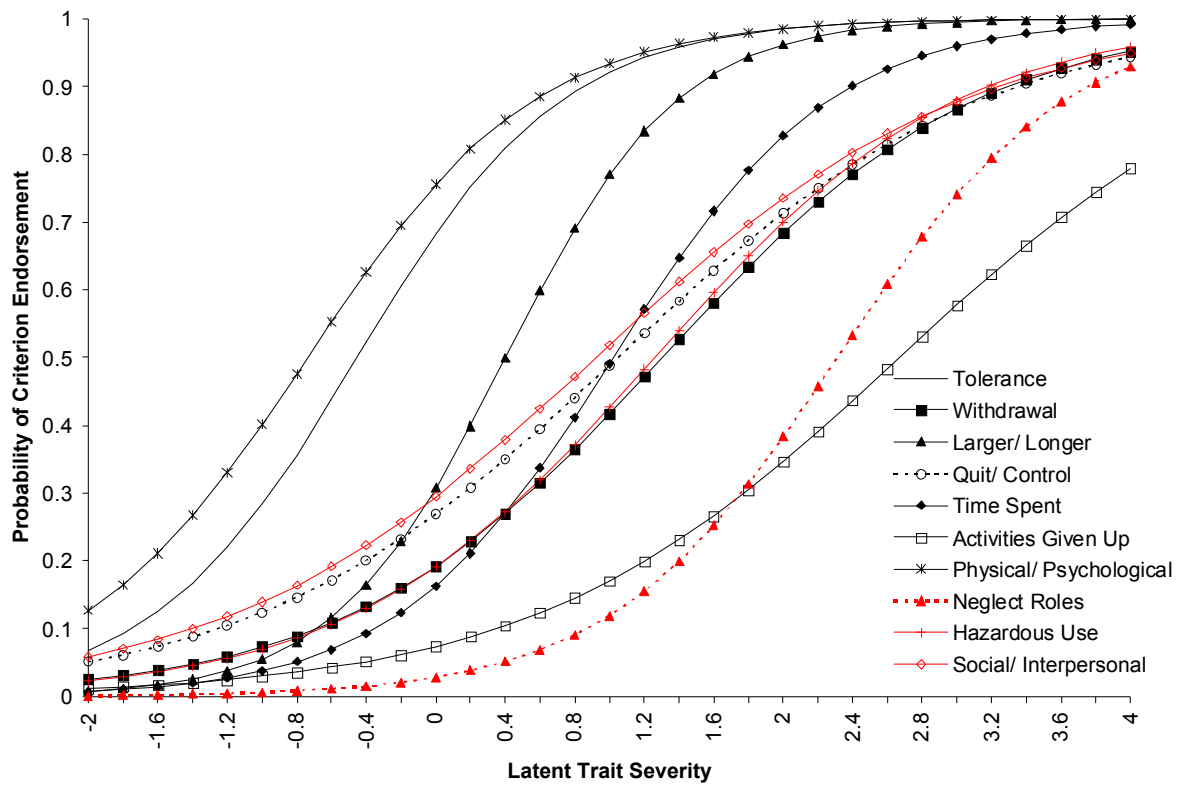

**Figure S2: Total Information Curves for Nicotine Dependence and Abuse Criteria in Current Smokers, N=521**

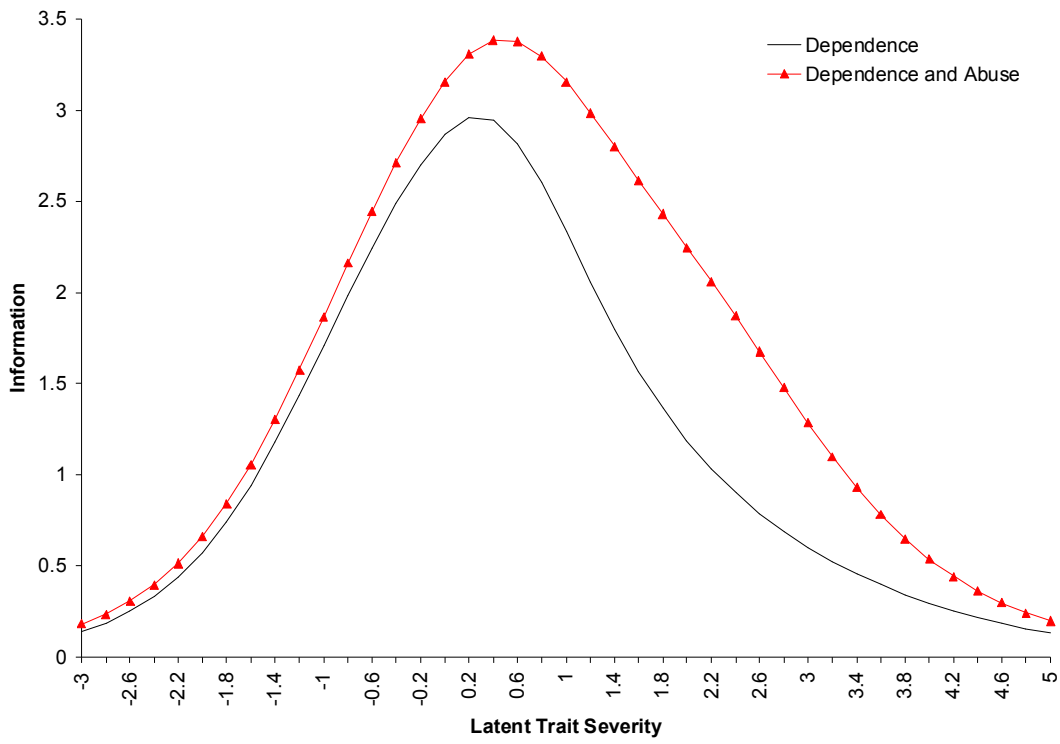

Supplement: NIHMS313813-supplement-01.pdf [file NIHMS313813-supplement-01.pdf]
